# Supplementary material for: Relative Efficacy of Checkpoint Inhibitors for Advanced NSCLC According to Programmed Death-Ligand-1 Expression: A Systematic Review and Network Meta-Analysis
Source: PubMed Central journal article supplement (PMC6078964; doi:10.1038/s41598-018-30277-0), 2018-08-06
Supplement: 41598_2018_30277_MOESM1_ESM.pdf [file 41598_2018_30277_MOESM1_ESM.pdf]

## **Supplementary Information**

Relative efficacy of checkpoint inhibitors for advanced NSCLC according to programmed death-ligand-1 expression: a systematic review and network meta-analysis.

Jinchul Kim, Jinhyun Cho, Moon Hee Lee, Joo Han Lim.

Supplementary Figure S1. Risk of bias of included studies

Supplementary Table S1. Relative effects in pooled hazard ratios and 95% credible intervals by PD-L1 expression level

Supplementary Table S2. Relative effects in pooled hazard ratios and 95% credible intervals by PD-L1 expression level in second-or later-line settings

Supplementary Table S3. Rank probability in second- or later-line settings

Supplementary Figure S1. Risk of bias of included studies

|              | Random sequence generation (selection bias) | Allocation concealment (selection bias) | Blinding of participants and personnel (performance bias) | Blinding of outcome assessment (detection bias) | Incomplete outcome data (attrition bias) | Selective reporting (reporting bias) | Other bias |
|--------------|---------------------------------------------|-----------------------------------------|-----------------------------------------------------------|-------------------------------------------------|------------------------------------------|--------------------------------------|------------|
| CheckMate017 | ?                                           | ?                                       | -                                                         | ?                                               | +                                        | +                                    | +          |
| CheckMate026 | ?                                           | ?                                       | -                                                         | +                                               | +                                        | +                                    | +          |
| CheckMate057 | ?                                           | ?                                       | -                                                         | ?                                               | +                                        | +                                    | +          |
| Keynote010   | +                                           | +                                       | -                                                         | +                                               | +                                        | +                                    | +          |
| Keynote024   | ?                                           | ?                                       | -                                                         | +                                               | +                                        | +                                    | +          |
| OAK          | +                                           | +                                       | -                                                         | ?                                               | +                                        | +                                    | +          |
| POPLAR       | +                                           | +                                       | -                                                         | +                                               | +                                        | +                                    | +          |

**Supplementary Table S1. Relative effects in pooled hazard ratios and 95% credible intervals by PD-L1 expression level**

**A. PD-L1 < 1%**

|              |                  |                  |
|--------------|------------------|------------------|
| Chemotherapy | 0.77 (0.63-0.96) | 0.79 (0.63-1.00) |
|              | Atezolizumab     | 1.02 (0.74-1.42) |
|              |                  | Nivolumab        |

**B. PD-L1 1-49%**

|              |                  |                  |                  |
|--------------|------------------|------------------|------------------|
| Chemotherapy | 0.83 (0.67-1.05) | 0.95 (0.79-1.15) | 0.76 (0.64-0.90) |
|              | Atezolizumab     | 1.14 (0.84-1.54) | 0.91 (0.69-1.20) |
|              |                  | Nivolumab        | 0.80 (0.62-1.04) |
|              |                  |                  | Pembrolizumab    |

**C. PD-L1 ≥ 50%**

|              |                  |                  |                  |
|--------------|------------------|------------------|------------------|
| Chemotherapy | 0.42 (0.29-0.61) | 0.63 (0.48-0.83) | 0.55 (0.46-0.66) |
|              | Atezolizumab     | 1.52 (0.95-2.40) | 1.31 (0.87-1.97) |
|              |                  | Nivolumab        | 0.87 (0.63-1.20) |
|              |                  |                  | Pembrolizumab    |

Each cell represents the effect of the column-defining intervention relative to the row-defining intervention. Effect estimates are presented as hazard ratios and 95% credible intervals are in parentheses.

**Supplementary Table S2. Relative effects in pooled hazard ratios and 95% credible intervals by PD-L1 expression level in second-or later-line settings**

**A. PD-L1 < 1%**

|              |                  |                  |
|--------------|------------------|------------------|
| Chemotherapy | 0.77 (0.63-0.96) | 0.79 (0.63-1.00) |
|              | Atezolizumab     | 1.02 (0.74-1.42) |
|              |                  | Nivolumab        |

**B. PD-L1 1-49%**

|              |                  |                  |                  |
|--------------|------------------|------------------|------------------|
| Chemotherapy | 0.83 (0.67-1.05) | 0.76 (0.59-1.00) | 0.76 (0.64-0.90) |
|              | Atezolizumab     | 0.92 (0.64-1.30) | 0.91 (0.69-1.20) |
|              |                  | Nivolumab        | 1.00 (0.73-1.37) |
|              |                  |                  | Pembrolizumab    |

**C. PD-L1 ≥ 50%**

|              |                  |                  |                   |
|--------------|------------------|------------------|-------------------|
| Chemotherapy | 0.42 (0.29-0.61) | 0.40 (0.27-0.61) | 0.51 (0.41-0.64)  |
|              | Atezolizumab     | 0.96 (0.55-1.66) | 1.22 (0.79-1.87)  |
|              |                  | Nivolumab        | 1.27 (0.80- 2.04) |
|              |                  |                  | Pembrolizumab     |

Each cell represents the effect of the column-defining intervention relative to the row-defining intervention. Effect estimates are presented as hazard ratios and 95% credible intervals are in parentheses.

### Supplementary Table S3. Rank probability in second- or later-line settings

#### A. PD-L1 < 1%

|              | Rank 1 | Rank 2 | Rank 3 |
|--------------|--------|--------|--------|
| Atezolizumab | 0.55   | 0.44   | 0.01   |
| Nivolumab    | 0.45   | 0.52   | 0.03   |
| Chemotherapy | 0      | 0.04   | 0.96   |

#### B. PD-L1 1-49%

|               | Rank 1 | Rank 2 | Rank 3 | Rank 4 |
|---------------|--------|--------|--------|--------|
| Atezolizumab  | 0.15   | 0.28   | 0.51   | 0.06   |
| Nivolumab     | 0.43   | 0.31   | 0.24   | 0.02   |
| Pembrolizumab | 0.42   | 0.41   | 0.17   | 0      |
| Chemotherapy  | 0      | 0      | 0.08   | 0.92   |

#### C. PD-L1 ≥ 50%

|               | Rank 1 | Rank 2 | Rank 3 | Rank 4 |
|---------------|--------|--------|--------|--------|
| Atezolizumab  | 0.42   | 0.42   | 0.16   | 0      |
| Nivolumab     | 0.53   | 0.33   | 0.13   | 0      |
| Pembrolizumab | 0.05   | 0.25   | 0.71   | 0      |
| Chemotherapy  | 0      | 0      | 0      | 1      |

Each cell represents the effect of the column-defining intervention relative to the row-defining intervention. Effect estimates are presented as hazard ratios and 95% credible intervals are in parentheses.
